# Supplementary material for: FANCJ helicase promotes DNA end resection by facilitating CtIP recruitment to DNA double-strand breaks
Source: PubMed Central journal article supplement (PMC7162537; doi:10.1371/journal.pgen.1008701), 2020-04-06
Supplement: pgen.1008701.s004.pdf [file pgen.1008701.s004.pdf]

| <b>Table S1: Sequences of qPCR Primers used for studying ssDNA generation</b> |                                   |              |                                 |
|-------------------------------------------------------------------------------|-----------------------------------|--------------|---------------------------------|
| <b>Primer name</b>                                                            | <b>Distance from <i>AsiSI</i></b> | <b>Oligo</b> | <b>Sequence (5'→3')</b>         |
| No DSB                                                                        |                                   | FWD          | ATTGGGTATCTGCGTCTAGTGAGG        |
|                                                                               |                                   | REV          | GACTCAATTACATCCCTGCAGCT         |
| DSB1                                                                          | 180 bp                            | FWD          | TGTGGACTCAGGGA ACTC             |
|                                                                               |                                   | REV          | CAGTCGCATACATCCGAT              |
| DSB1                                                                          | 335 bp                            | FWD          | GAATCGGATGTATGCGACTGATC         |
|                                                                               |                                   | REV          | TTCCAAAGTTATTCCAACCCGAT         |
| DSB1                                                                          | 1618 bp                           | FWD          | TGAGGAGGTGACATTAGA ACTCAGA      |
|                                                                               |                                   | REV          | AGGACTCACTTACACGGCCTTT          |
| DSB1                                                                          | 3500 bp                           | FWD          | TCCTAGCCAGATAATAATAGCTATACAAACA |
|                                                                               |                                   | REV          | TGAATAGACAGACAACAGATAAATGAGACA  |
| DSB2                                                                          | 129 bp                            | FWD          | GCTGGAGTGTACGGGCCC              |
|                                                                               |                                   | REV          | G TTCCTGGCCGGGACAGC             |
| DSB2                                                                          | 364 bp                            | FWD          | CCAGCAGTAAAGGGGAGACAGA          |
|                                                                               |                                   | REV          | CTGTTCAATCGTCTGCCCTTC           |
| DSB2                                                                          | 1754 bp                           | FWD          | GAAGCCATCCTACTCTTCTCACCT        |
|                                                                               |                                   | REV          | GCTGGAGATGATGAAGCCCA            |
| DSB2                                                                          | 3564 bp                           | FWD          | GCCAGCTAAGATCTTCCTTCA           |
|                                                                               |                                   | REV          | CTCCTTTGCCCTGAGAAGTGA           |
| Across DSB1                                                                   |                                   | FWD          | GATGTGGCCAGGGATTGG              |
|                                                                               |                                   | REV          | CACTCAAGCCCAACCCGT              |
| Across DSB2                                                                   |                                   | FWD          | GAGGAGCCTCTCCTGCAGC             |
|                                                                               |                                   | REV          | GAACCAGACCTACCTCCAGGG           |
