# Supplementary material for: FANCJ helicase promotes DNA end resection by facilitating CtIP recruitment to DNA double-strand breaks
Source: PubMed Central journal article supplement (PMC7162537; doi:10.1371/journal.pgen.1008701), 2020-04-06
Supplement: pgen.1008701.s005.pdf [file pgen.1008701.s005.pdf]

| <b>Table S2: DSB% at DSB1 and DSB2 sites</b> |                            |                         |                     |  |
|----------------------------------------------|----------------------------|-------------------------|---------------------|--|
| <b>Figure no.</b>                            | <b>Treatment</b>           | <b>DSB% at DSB1</b>     | <b>DSB% at DSB2</b> |  |
| Fig. 1J                                      | shControl                  | 28.5 ± 1.9              | 19.5 ± 3.1          |  |
|                                              | shBRCA1                    | 18.3 ± 2.5              | 7.95 ± 2.3          |  |
|                                              | shMRE11                    | 19.7 ± 5.03             | 7.57 ± 2.7          |  |
|                                              | shCtIP                     | 19.5 ± 4.3              | 8.47 ± 2.3          |  |
|                                              | shFANCI # 1                | 23.5 ± 2.88             | 15.7 ± 4.24         |  |
|                                              | shFANCI # 2                | 23.3 ± 5.05             | 16.5 ± 2.1          |  |
|                                              | shDNA2                     | 23.7 ± 4.76             | 16.8 ± 3.7          |  |
|                                              | sh53BP1                    | 25.3 ± 4.5              | 17.9 ± 2.28         |  |
| Fig. 2G                                      | shControl                  | 22.3 ± 5.3              | 15.8 ± 2.01         |  |
|                                              | shFANCI # 1                | 26.7 ± 3.05             | 17.3 ± 3.07         |  |
|                                              | shCtIP                     | 27.7 ± 2.08             | 17.9 ± 3.19         |  |
|                                              | shFANCI # 1 + shCtIP       | 21.6 ± 7.6              | 12.22 ± 1.03        |  |
| Fig. 3D                                      | shControl                  | 24.3 ± 3.05             | 13.7 ± 1.16         |  |
|                                              | shFANCI # 1                | 16.7 ± 0.57             | 9.45 ± 0.79         |  |
|                                              | shFANCI # 1 + WT-FANCI     | 18.3 ± 5.77             | 10.4 ± 0.87         |  |
|                                              | shFANCI # 1 + 1-881 FANCI  | 26.7 ± 3.5              | 15.11 ± 1.3         |  |
| Fig. 4C                                      | shControl                  | 22.7 ± 6.6              | 12.8 ± 1.08         |  |
|                                              | shFANCI # 1                | 20.0 ± 4.58             | 11.3 ± 0.95         |  |
|                                              | shFANCI # 1 + WT-FANCI     | 21.0 ± 1.26             | 11.8 ± 1.00         |  |
|                                              | shFANCI # 1 + S990A-FANCI  | 24.3 ± 2.52             | 13.8 ± 1.16         |  |
|                                              | shFANCI # 1 + S990E-FANCI  | 28.5 ± 1.28             | 16.13 ± 1.36        |  |
| Fig. 5C                                      | shControl                  | 19.7 ± 5.5              | 11.15 ± 0.94        |  |
|                                              | shFANCI # 1                | 19.3 ± 0.6              | 10.95 ± 0.92        |  |
|                                              | shFANCI # 1 + WT-FANCI     | 21.0 ± 1.8              | 11.9 ± 1.00         |  |
|                                              | shFANCI # 1 + K1249R-FANCI | 19.3 ± 3.78             | 15.01 ± 2.84        |  |
|                                              | shFANCI # 1 + K1249Q-FANCI | 23.6 ± 4.6              | 18.3 ± 3.46         |  |
| Fig. 8C                                      | shControl                  | shCtIP + EV             | 22.0 ± 2.2          |  |
|                                              |                            | shCtIP + WT-CtIP (R)    | 21.4 ± 3.7          |  |
|                                              |                            | shCtIP + S327A-CtIP (R) | 24.0 ± 1.9          |  |
|                                              |                            | shCtIP + T847A-CtIP (R) | 19.8 ± 5.6          |  |
|                                              | shFANCI                    | shCtIP + EV             | 18.5 ± 6.2          |  |
|                                              |                            | shCtIP + WT-CtIP (R)    | 21.0 ± 3.1          |  |
|                                              |                            | shCtIP + T847A-CtIP (R) | 15.6 ± 3.2          |  |
| Fig.8D                                       | shControl                  | 20.7 ± 1.43             | 9.54 ± 0.81         |  |
|                                              | shFANCI # 1                | 15.1 ± 0.62             | 10.14 ± 1.13        |  |
|                                              | shBRCA1                    | 17.3 ± 1.5              | 11.37 ± 2.71        |  |
|                                              | shFANCI # 1 + shBRCA1      | 18.5 ± 3.3              | 7 ± 0.68            |  |
| Fig. 9E                                      | shControl                  | 20.0 ± 5.2              | 9.04 ± 1.89         |  |
|                                              | shFANCI # 1                | 21.3 ± 3.78             | 9.5 ± 1.95          |  |

| Figure no. | Treatment                | DSB% at DSB1 | DSB% at DSB2 |
|------------|--------------------------|--------------|--------------|
|            | shFANCJ # 1 + WT-FANCJ   | 23.3 ± 4.7   | 10.5 ± 2.17  |
|            | shFANCJ # 1 + K52A-FANCJ | 28.3 ± 2.08  | 12.8 ± 2.6   |
|            | shFANCJ # 1 + K52R-FANCJ | 20.6 ± 1.38  | 9.3 ± 1.9    |

**\* Summary of the % DSBs at the two selected AsiSI sites after 4 h of 4-OHT treatment.**

% DSB values were measured by qPCR using undigested gDNA samples and two sets of primers across the two AsiSI sites (Fig. 1A). The ‘No DSB’ primers were used to normalize the amount of gDNA in the qPCR reaction. DSB percentages at DSB1 and DSB2 sites in mock-treated cells were both set to zero.
