# Supplementary material for: FANCJ helicase promotes DNA end resection by facilitating CtIP recruitment to DNA double-strand breaks
Source: PubMed Central journal article supplement (PMC7162537; doi:10.1371/journal.pgen.1008701), 2020-04-06
Supplement: pgen.1008701.s006.pdf [file pgen.1008701.s006.pdf]

**Table S3: Sequences of primers used in this study**

| Primer name                     | Oligo | Sequence (5'→3')                                                                      |
|---------------------------------|-------|---------------------------------------------------------------------------------------|
| WT-FANCJ                        | FWD   | ATAGAGATATCATGTCTTCAATGTGGTCT                                                         |
|                                 | REV   | ATAGACTCGAGTCAGTGATGGTGGTGTGGTGTGCATAGTCGGGGACGTCA<br>TAGGGGTACTTAAAACCAGGAAA         |
| S990A-FANCJ                     | FWD   | TCCAGATCCACAG <u>GCCCCA</u> ACTTTCAAC                                                 |
|                                 | REV   | GTTGAAAGTTGG <u>GGCT</u> GTGGATCTGGA                                                  |
| S990E-FANCJ                     | FWD   | TCCAGATCCACAG <u>GAGC</u> CAACTTTCAAC                                                 |
|                                 | REV   | GTTGAAAGTTGG <u>CTCT</u> GTGGATCTGGA                                                  |
| K52A-FANCJ                      | FWD   | ACAGGAAGTGGAG <u>GCA</u> AGCTTAGCCTTA                                                 |
|                                 | REV   | TAAGGCTAAGCT <u>TGCT</u> CCACTTCCTGT                                                  |
| K52R-FANCJ                      | FWD   | ACAGGAAGTGGAC <u>GCA</u> AGCTTAGCCTTA                                                 |
|                                 | REV   | TAAGGCTAAGCT <u>TCGT</u> CCACTTCCTGT                                                  |
| K1249R-FANCJ                    | FWD   | TTTCCTGGTTTT <u>AGG</u> TACCCCTATGAC                                                  |
|                                 | REV   | GTCATAGGGGTAC <u>CCT</u> AAAACCAGGAAA                                                 |
| K1249Q FANCJ                    | FWD   | TTTCCTGGTTTT <u>CAG</u> TACCCCTATGAC                                                  |
|                                 | REV   | GTCATAGGGGTAC <u>CTG</u> AAAACCAGGAAA                                                 |
| 1-881 FANCJ                     | FWD   | ATAGAGATATCATGTCTTCAATGTGGTCT                                                         |
|                                 | REV   | ATAGAGGCCCTCAGTGATGGTGGTGTGGTGTG<br>TGCATAGTCGGGGACGTGCATAGGGGTACTTTTTGGAAAATTCAGCCAA |
| FANCJ shRNA#1 resistant primers | FWD   | ACCTCTTTAAA <u>ATATAGCACATCCCTACTT</u> ACTGGAA                                        |
|                                 | REV   | TTCCAGTAA <u>G</u> TAG <u>GGG</u> GAT <u>I</u> GT <u>GCT</u> <u>ATAT</u> TTTTAAAGAGGT |
| S327A-CtIP                      | FWD   | ACTCGAGTGTCAG <u>GCTC</u> CTGTATTTGGA                                                 |
|                                 | REV   | TCCAAATACAGG <u>AGCT</u> GACACTCGAGT                                                  |
| T847A-CtIP                      | FWD   | ATTCCACCCAAC <u>GCA</u> CCAGAGAATTTT                                                  |
|                                 | REV   | AAAATTCTCTGG <u>TGCG</u> TTGGGTGGAAT                                                  |
