# Supplementary material for: FANCJ helicase promotes DNA end resection by facilitating CtIP recruitment to DNA double-strand breaks
Source: PubMed Central journal article supplement (PMC7162537; doi:10.1371/journal.pgen.1008701), 2020-04-06
Supplement: pgen.1008701.s007.pdf [file pgen.1008701.s007.pdf]

| <b>Table S4: Sequence of shRNAs used in this study</b> |                         |                        |
|--------------------------------------------------------|-------------------------|------------------------|
| <b>shRNA</b>                                           | <b>Sequence (5'→3')</b> | <b>REFERENCE</b>       |
| FANCI # 1                                              | GTACAGTACCCACCTTAT      | Litman et al. 2005     |
| FANCI # 2                                              | AGCTTACCCGTCACA         | Litman et al. 2005     |
| BRCA1                                                  | GTGTGCAGCTGAGAGGCA      | Gorski et al., 2010    |
| MRE11                                                  | ACAGGAGAAGAGATCAACT     | Xie et al.,2009        |
| CtIP                                                   | GCTAAAACAGGAACGAATCTT   | Yu et al., 2004        |
| DNA2                                                   | CAGTATCTCCTCTAGCTAG     | Thangavel et al., 2015 |
| EXO1                                                   | CAAGCCTATTCTCGTATTTTT   | Karanja et al., 2012   |
| 53BP1                                                  | GATACTGCCTCATCACAGT     | Squatrito et al., 2012 |
| BLM                                                    | CCGAATCTCAATGTACATAGA   | Berti et al.,2013      |

### **Supplementary material references**

Berti, M., Ray Chaudhuri, A., Thangavel, S., Gomathinayagam, S., Kenig, S., Vujanovic, M., Odreman, F., Glatter, T., Graziano, S., Mendoza-Maldonado, R., et al. (2013). Human RECQ1 promotes restart of replication forks reversed by DNA topoisomerase I inhibition. *Nature structural & molecular biology* 20, 347-354.

Gorski, J.J., James, C.R., Quinn, J.E., Stewart, G.E., Staunton, K.C., Buckley, N.E., McDyer, F.A., Kennedy, R.D., Wilson, R.H., Mullan, P.B., et al. (2010). BRCA1 transcriptionally regulates genes associated with the basal-like phenotype in breast cancer. *Breast cancer research and treatment* 122, 721-731.

Karanja, K.K., Cox, S.W., Duxin, J.P., Stewart, S.A., and Campbell, J.L. (2012). DNA2 and EXO1 in replication-coupled, homology-directed repair and in the interplay between HDR and the FA/BRCA network. *Cell cycle* 11, 3983-3996.

Litman, R., Peng, M., Jin, Z., Zhang, F., Zhang, J., Powell, S., Andreassen, P.R., and Cantor, S.B. (2005). BACH1 is critical for homologous recombination and appears to be the Fanconi anemia gene product FANCI. *Cancer cell* 8, 255-265.

Squatrito, M., Vanoli, F., Schultz, N., Jasin, M., and Holland, E.C. (2012). 53BP1 is a haploinsufficient tumor suppressor and protects cells from radiation response in glioma. *Cancer research* 72, 5250-5260.

Thangavel, S., Berti, M., Levikova, M., Pinto, C., Gomathinayagam, S., Vujanovic, M., Zellweger, R., Moore, H., Lee, E.H., Hendrickson, E.A., et al. (2015). DNA2 drives processing and restart of reversed replication forks in human cells. *The Journal of cell biology* 208, 545-562.

Xie, A., Kwok, A., and Scully, R. (2009). Role of mammalian Mre11 in classical and alternative nonhomologous end joining. *Nature structural & molecular biology* 16, 814-818.

Yu, X., and Chen, J. (2004). DNA damage-induced cell cycle checkpoint control requires CtIP, a phosphorylation-dependent binding partner of BRCA1 C-terminal domains. *Molecular and cellular biology* 24, 9478-9486.
