# Supplementary material for: FANCJ helicase promotes DNA end resection by facilitating CtIP recruitment to DNA double-strand breaks
Source: PubMed Central journal article supplement (PMC7162537; doi:10.1371/journal.pgen.1008701), 2020-04-06
Supplement: pgen.1008701.s008.pdf [file pgen.1008701.s008.pdf]

| <b>Table S5: List of Antibodies used in this study</b> |                 |                            |                  |
|--------------------------------------------------------|-----------------|----------------------------|------------------|
| <b>Antigen name</b>                                    | <b>Dilution</b> | <b>Source</b>              | <b>Catalog #</b> |
| FANCI                                                  | 1:1000          | Sigma Aldrich              | B1310            |
| BRCA1                                                  | 1:200           | Santa Cruz                 | sc-6954          |
| BARD1                                                  | 1:1000          | Bethyl Laboratories        | A300-263A        |
| MRE11                                                  | 1:1000          | Novus Biologicals          | NB100-142        |
| CtIP                                                   | 1:1000          | Bethyl Laboratories        | A300-488A        |
| MLH1                                                   | 1:1000          | BD Biosciences             | 51-1327GR        |
| RAD51                                                  | 1:500           | Santa Cruz                 | sc-8349          |
| RPA70                                                  | 1:500           | Santa Cruz                 | sc-28304         |
| RPA32                                                  | 1:500           | Santa Cruz                 | sc-56770         |
| pRPA32 (S4/S8)                                         | 1:200 for IF    | Bethyl Laboratories        | A300-245A        |
| BrdU                                                   | 1:100 for IF    | BD Biosciences             | 555627           |
| $\gamma$ -H2AX (pS139)                                 | 1:1000          | BD Biosciences             | 560443           |
| pKAP1                                                  | 1:1000          | Abcam                      | ab70369          |
| DNA2                                                   | 1:1000          | Abcam                      | Ab96488          |
| EXO1                                                   | 1:500           | Invitrogen                 | MA5-12262        |
| BLM                                                    | 1:500           | Bethyl Laboratories        | A300-110A        |
| AceK                                                   | 1:500           | Cell signalling technology | #9441            |
| 53BP1                                                  | 1:200           | Santa Cruz                 | sc-22760         |
| MCM3                                                   | 1:500           | Santa Cruz                 | sc-365616        |
| PCNA                                                   | 1:500           | Santa Cruz                 | sc-56            |
| $\alpha$ -Tubulin                                      | 1:1000          | Santa Cruz                 | sc-5286          |
| HA tag                                                 | 1:1000          | Roche                      | 10952100         |
| GFP tag (ChIP grade)                                   | 1:1000          | Abcam                      | ab290            |
| CENP-F                                                 | 1: 200          | Novus Biologicals          | NB500-101        |
