# Supplementary material for: FANCJ helicase promotes DNA end resection by facilitating CtIP recruitment to DNA double-strand breaks
Source: PubMed Central journal article supplement (PMC7162537; doi:10.1371/journal.pgen.1008701), 2020-04-06
Supplement: pgen.1008701.s009.pdf [file pgen.1008701.s009.pdf]

**Table S6: Sequences of Primers used in this study for ChIP-PCR**

| <b>Primer Name</b> | <b>Oligo</b> | <b>Sequence (5'→3')</b> |
|--------------------|--------------|-------------------------|
| DSB1               | FWD          | GATTGG CTATGGGTGTGGAC   |
|                    | REV          | CATCCTTGCA AACCAGTCCT   |
| DSB2               | FWD          | TTCCTGCAGCCTCATTTTCT    |
|                    | REV          | TGATGATGCCTTTTCCCTTC    |
| GAPDH              | FWD          | GCAGCCCCTTCATACCCTCACGT |
|                    | REV          | GAGCCACACCATCCTAGTTGC   |
